# Supplementary material for: The Effect of Freeze-Thaw Cycles on Gene Expression Levels in Lymphoblastoid Cell Lines
Source: PubMed Central journal article supplement (PMC4156430; doi:10.1371/journal.pone.0107166), 2014-09-05
Supplement: pone.0107166.s001.pdf [file pone.0107166.s001.pdf]

**Supplementary Material: The effect of freeze-thaw cycles on gene expression levels  
in lymphoblastoid cell lines**

Minal Çalışkan, Jonathan K. Pritchard, Carole Ober, Yoav Gilad

**Table of Contents**

|                                                                                                                                                                                            |    |
|--------------------------------------------------------------------------------------------------------------------------------------------------------------------------------------------|----|
| Figure S1. Study Design .....                                                                                                                                                              | 2  |
| Figure S2. Pair-wise Euclidean distances .....                                                                                                                                             | 3  |
| Figure S3. Correlation between gene expression levels and EBV copy numbers .....                                                                                                           | 4  |
| Figure S4. Relative mtDNA copy numbers in LCLs .....                                                                                                                                       | 5  |
| Figure S5. Box plots of within-individual pair-wise correlation coefficients .....                                                                                                         | 6  |
| Figure S6. PCA plots after regressing out the effects of EBV and mtDNA .....                                                                                                               | 7  |
| Figure S7. Box plots of between-individual pair-wise correlation coefficients .....                                                                                                        | 8  |
| Figure S8. Bar plots showing the percent genes with eQTLs .....                                                                                                                            | 9  |
| Figure S9. Mean coefficient of variation (CV) of gene expression .....                                                                                                                     | 10 |
| Figure S10. CV of gene expression in EBV and mtDNA regressed out data .....                                                                                                                | 11 |
| Table S1. Properties of the cells used in the study .....                                                                                                                                  | 12 |
| Table S2. <i>P</i> values derived from testing the hypothesis that the means of the EBV copy numbers between each freeze-thaw cycle are the same .....                                     | 13 |
| Table S3. Pathway enrichment results of EBV correlated genes .....                                                                                                                         | 14 |
| Table S4. <i>P</i> values derived from testing the hypothesis that the means of the mtDNA copy numbers between each freeze-thaw cycle are the same .....                                   | 15 |
| Table S5. <i>P</i> values derived from testing the hypothesis that the means of the inter-individual correlation between each freeze-thaw cycle are the same .....                         | 16 |
| Table S6. Pathway enrichment results for the ‘highly variable’ genes across all cell types/freeze-thaw cycles .....                                                                        | 17 |
| Table S7. Pathway enrichment results for the ‘highly variable’ genes only within a specific cell type/freeze-thaw cycle .....                                                              | 18 |
| Table S8. <i>P</i> values derived from testing the hypothesis that the proportion of genes with eQTLs among ‘highly variable’ genes is equal to that among all the genes in our data ..... | 19 |
| Table S9. <i>P</i> values derived from testing the hypothesis that the coefficient of variation of gene expression between genes with eQTLs is equal to that of all expressed genes .....  | 20 |
| Table S10. Number of overlap between 503 genes that were ‘highly variable’ across each cell type/freeze-thaw cycle and genes with eQTLs .....                                              | 21 |
| Table S11. <i>P</i> values from the linear regressions testing the association between cell type, freeze-thaw cycle, individual and the first five principal components .....              | 22 |

**Figure S1. A)** CD20+ B cells and 6 independent LCL cultures were obtained from six unrelated individuals (3 males; M1, M2, M3, 3 females; F1, F2, F3) between October 2009 and January 2010. Each LCL culture was thawed at every 3 months (February 2011=cycle 1, June 2011=cycle 2, October 2011=cycle 3, February 2012=cycle 4, June 2012=cycle 5, and October 2012=cycle 6) and cultured until obtaining ~10 million cells. RNA and DNA were extracted at every other freeze-thaw cycle (June 2011=cycle 2, February 2012=cycle 4, October 2012=cycle 6). **B)** Genome wide gene expression data were obtained at 4 different time points. 47 technical hybridization replicates (rep) were included to be able to assess the reproducibility of the data.

**A)**

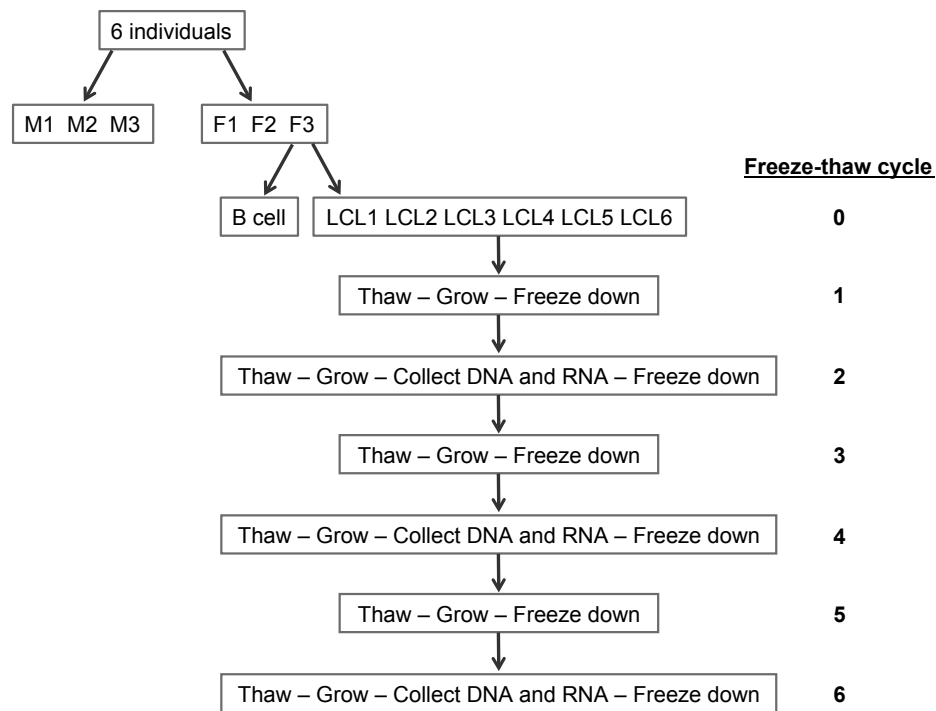

**B)**

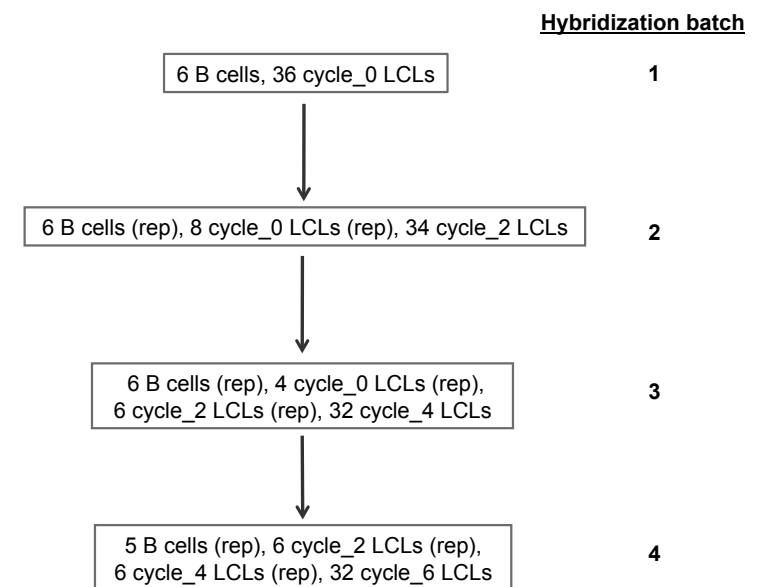

**Figure S2.** Pair-wise Euclidean distances along PC1/PC2 plane within and between classes of cells. T test on the pair wise Euclidean distance within and between classes of cells;  $P < 2.2 \times 10^{-16}$ .

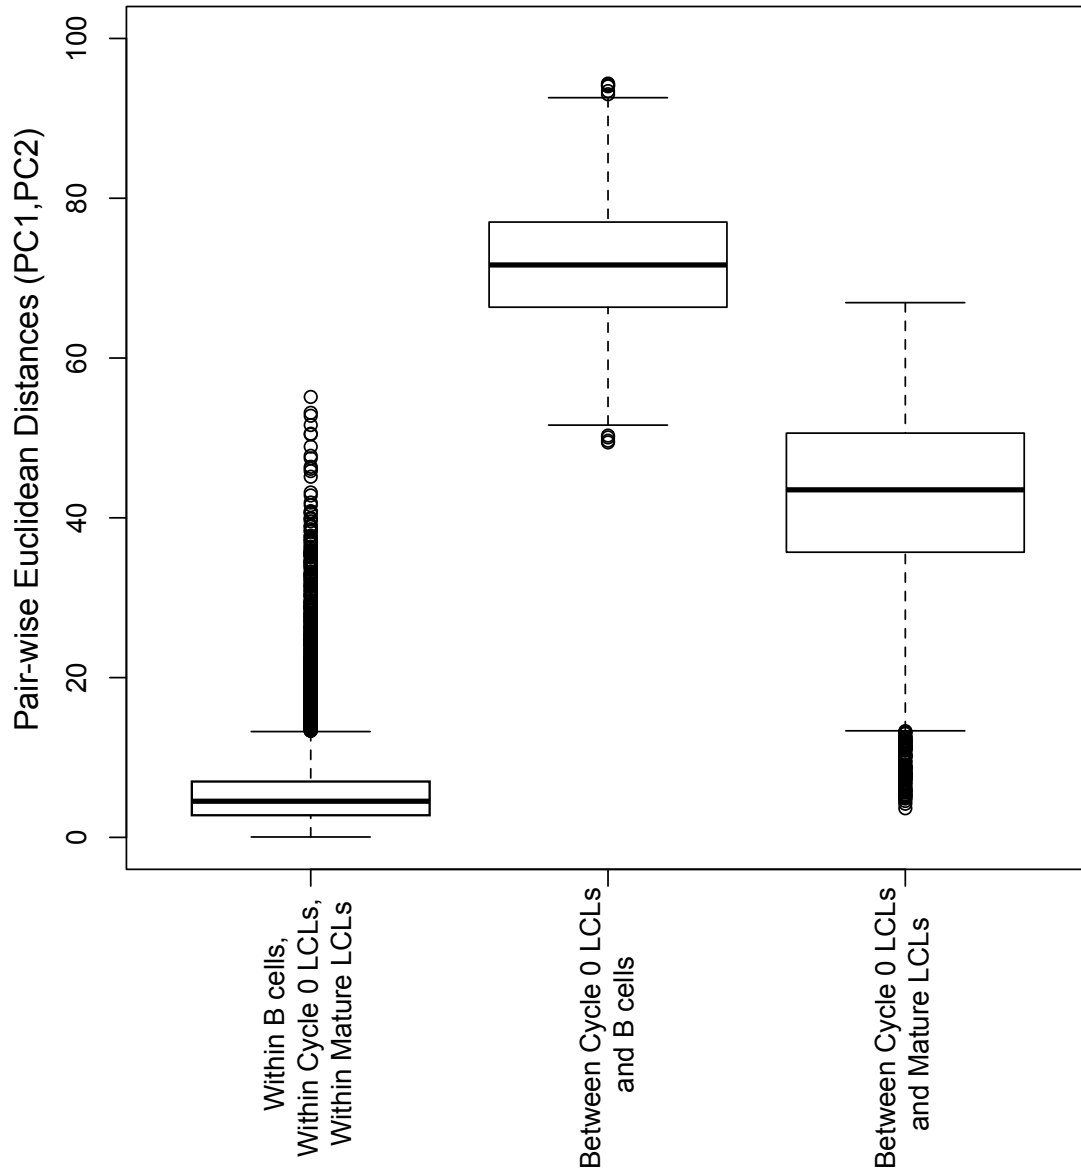

**Figure S3.** Distribution of the absolute value of Spearman rank correlation coefficient between gene expression levels and EBV copy numbers. Blue, green, purple, and orange curves correspond to correlation coefficients in cycle 0, cycle 2, cycle 4, and cycle 6 LCLs, respectively. Black, dark gray, and light gray curves correspond to each of the three null distributions within each cycle (expectation based on permutation).

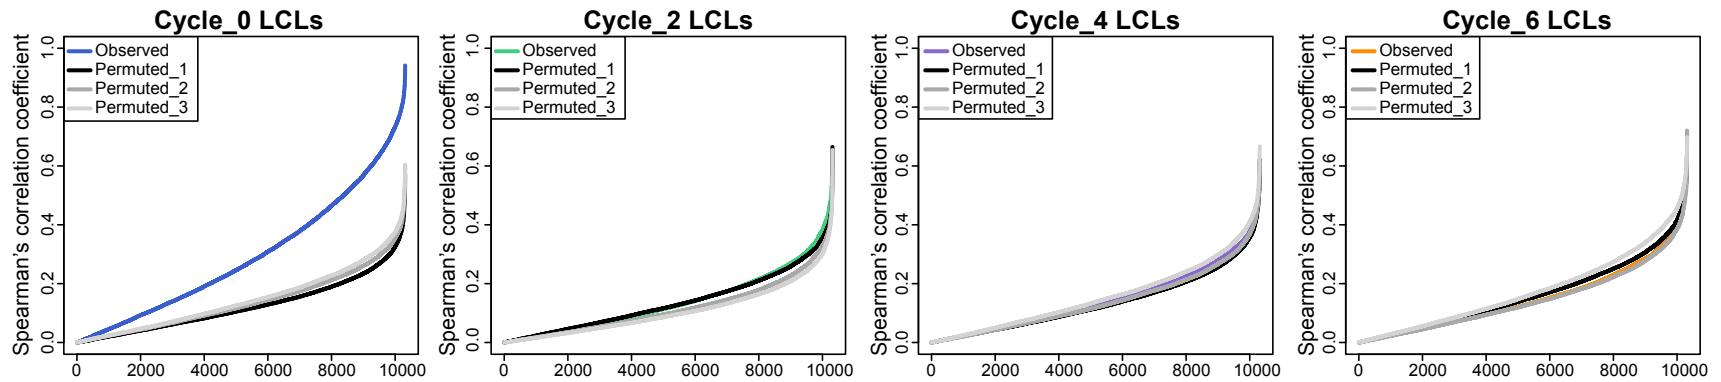

**Figure S4.** Relative mtDNA copy numbers in LCLs from six individuals. Error bars indicate the standard error of the mean.

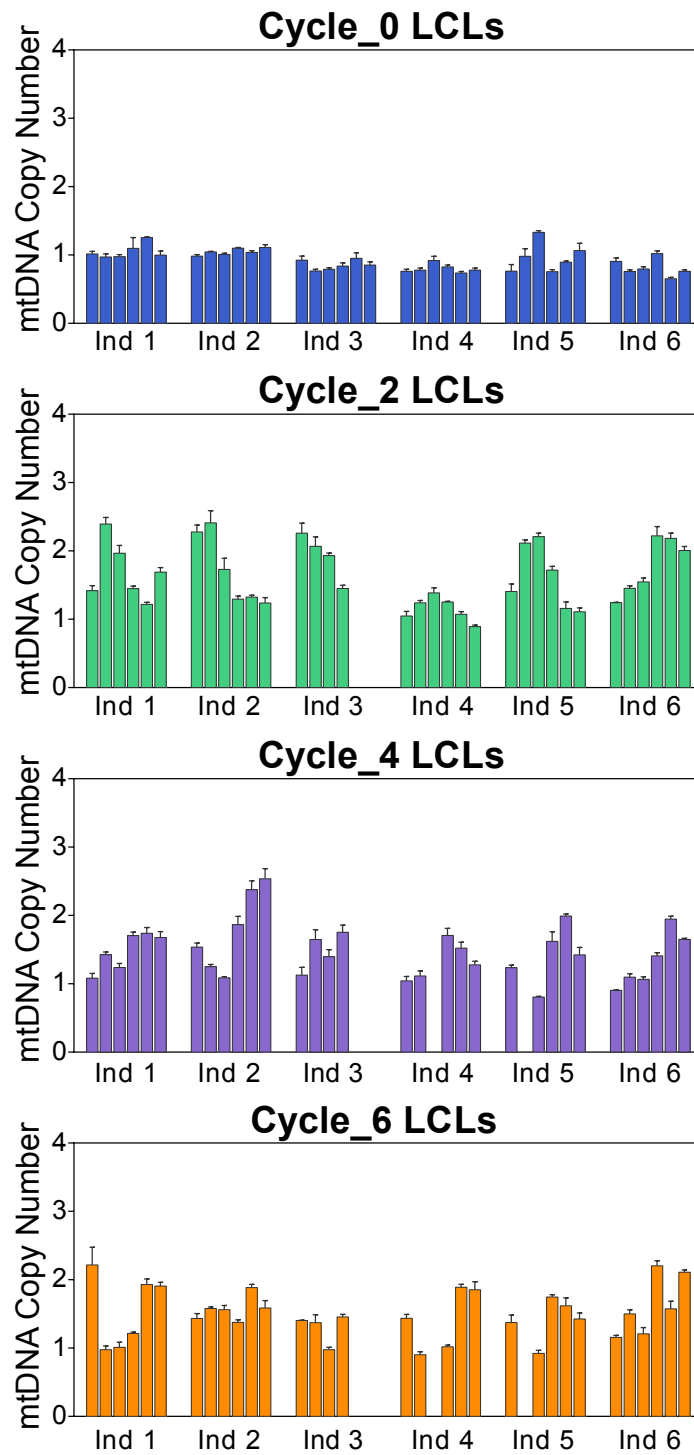

**Figure S5.** Box plots of within-individual pair-wise Pearson correlation coefficients of gene expression profiles in cycle 0 (c0), cycle 2 (c2), cycle 4 (c4), and cycle 6 (c6) LCLs.

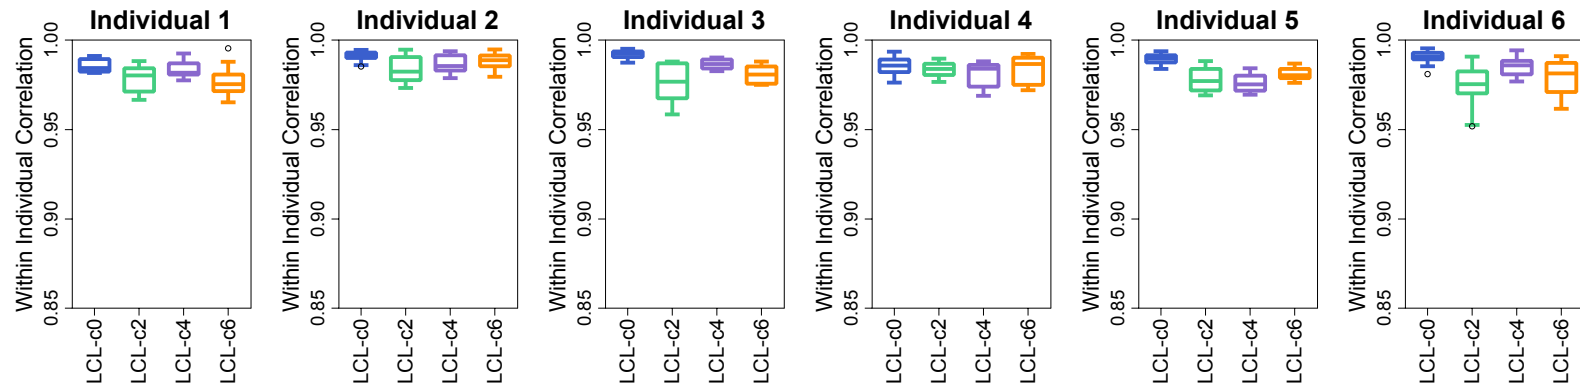

**Figure S6.** Plots of the first two principal components of the PCA after regressing out the effects of EBV and mtDNA copy numbers. PCA was applied to the genome-wide expression data of **A)** cycle 0 and cycle 2 **B)** cycle 0 and cycle 4 **C)** cycle 0 and cycle 6 LCLs. Numbers correspond to each of six individuals.

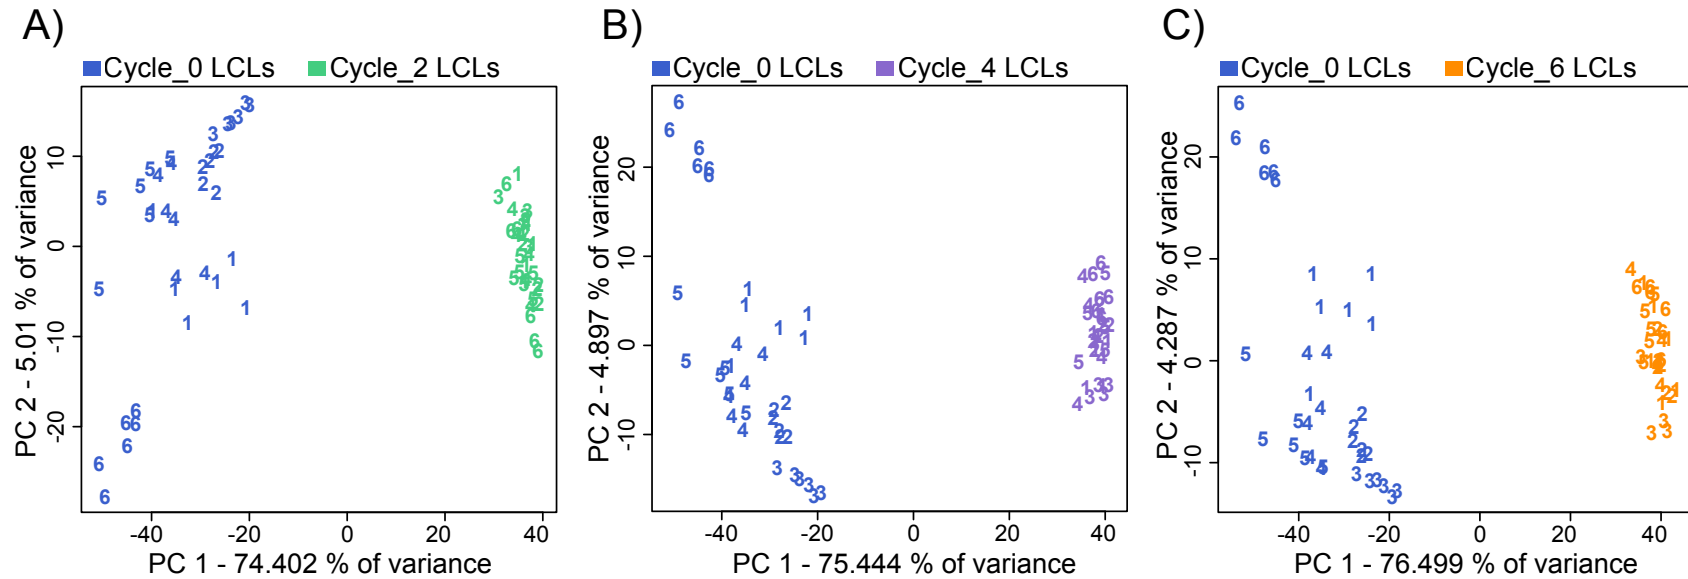

**Figure S7.** Box plots of between-individual pair-wise Pearson correlation coefficients of gene expression profiles in B cells, cycle 0 (c0), cycle 2 (c2), cycle 4 (c4), and cycle 6 (c6) LCLs.

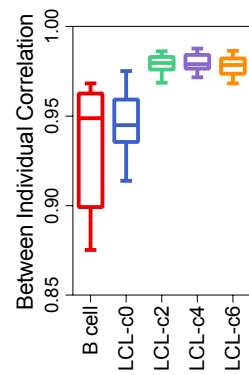



**Figure S8. A)** Bar plots showing the percent genes with eQTLs (as identified in seven eQTL studies performed in LCLs) among all the genes detected as expressed and among ‘highly variable’ genes in B cells, cycle 0, cycle 2, cycle 4, and cycle 6 LCLs. **B)** Bar plots showing the percent genes with eQTLs (as identified in eQTL studies in cortex, liver, fibroblast, T cell, and monocyte) among all the genes detected as expressed and among ‘highly variable’ genes in B cells, cycle 0, cycle 2, cycle 4, and cycle 6 LCLs. For each eQTL study, Fisher’s exact test (two-sided) was used to test the null hypothesis that the proportion of genes with eQTLs among ‘highly variable’ genes is equal to that among all the genes in our data. Asterisks indicate  $P$  values  $< 8.3 \times 10^{-4}$  (Bonferroni corrected significance threshold).  $P$  values of each comparison are included in Table S8.

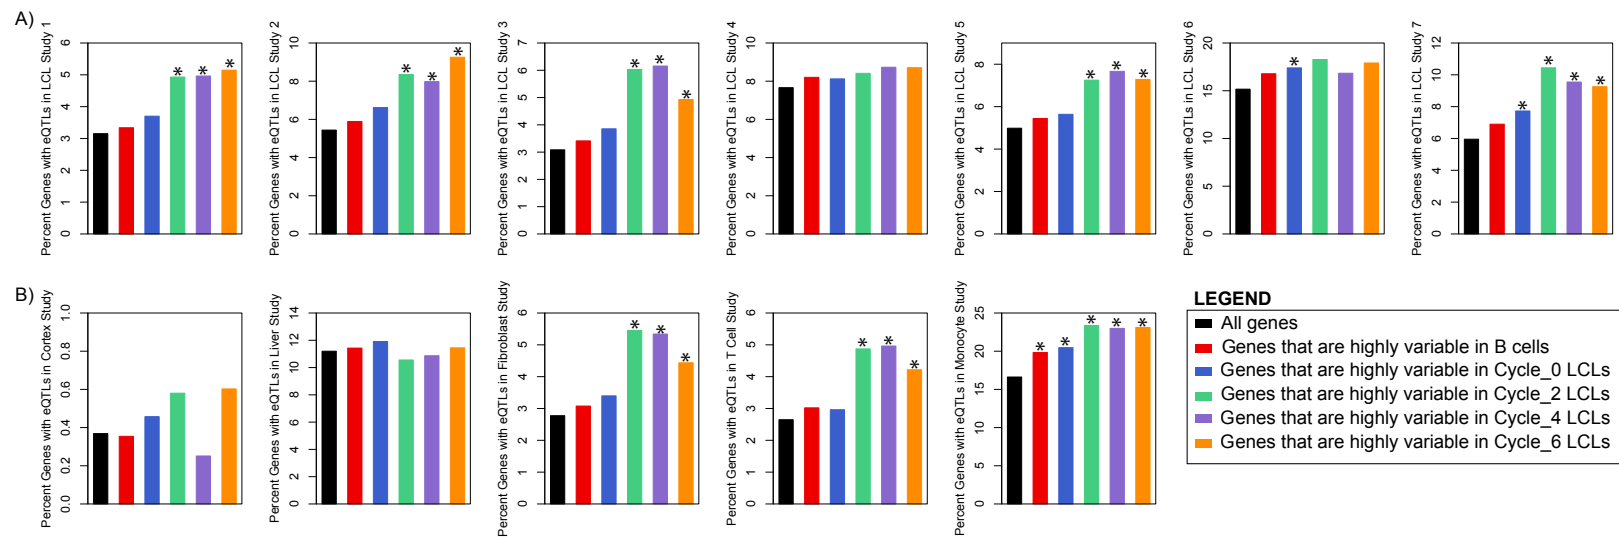

**Figure S9. A)** Mean coefficient of variation of gene expression within each cell type/freeze-thaw cycle for all the genes detected as expressed and for genes with eQTLs in seven different eQTL studies performed in LCLs. **B)** Mean coefficient of variation of gene expression within each cell type/freeze-thaw cycle for all the genes detected as expressed and for genes with eQTLs in eQTL studies performed in cortex, liver, fibroblast, T cell, and monocyte.

A)

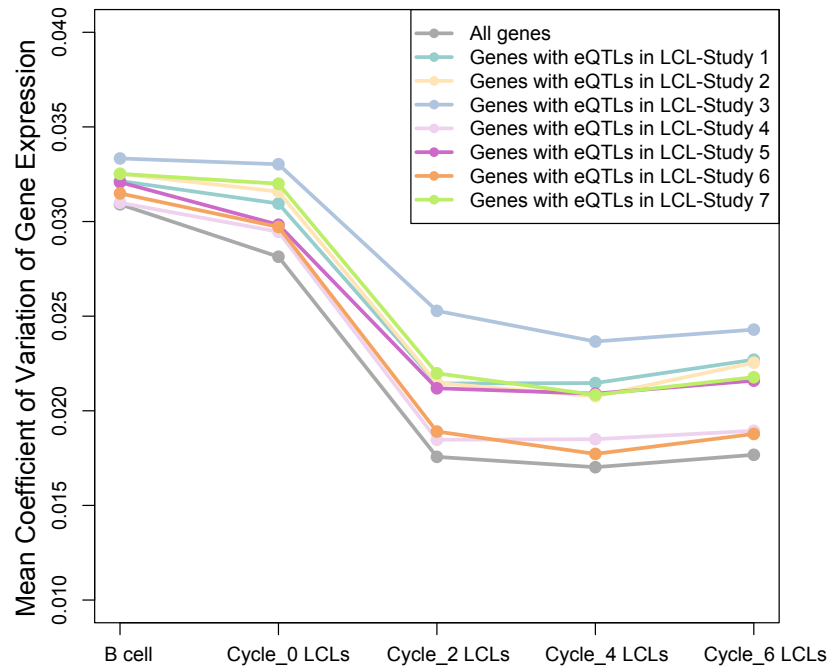

B)

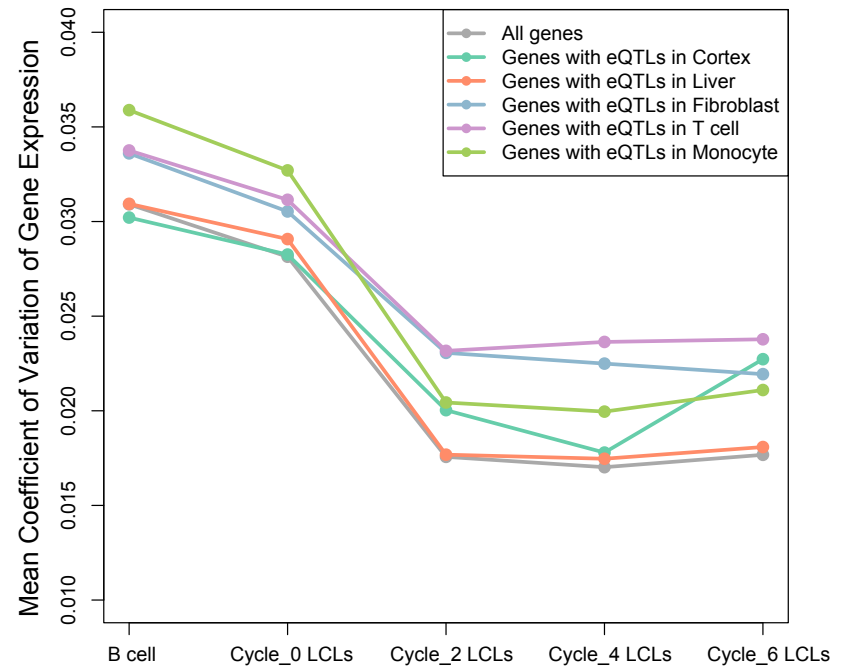

**Figure S10.** All results represented in Figure S10 are obtained after regressing out the effects of EBV and mtDNA copy numbers from gene expression data of each freeze-thaw cycle. **A)** Density distributions of the coefficient of variation (CV) of gene expression between-individuals within primary B cells and within LCLs of each freeze-thaw cycle. Black vertical line designates the arbitrarily chosen threshold of CV of 0.025. **B)** Bar plots showing the numbers of genes classified as having ‘highly variable’ expression patterns in the primary B cells, cycle 0, cycle 2, cycle 4, and cycle 6 LCLs. **C)** Venn diagram showing the overlaps in genes with ‘highly variable’ expression patterns across primary B cells, cycle 0, cycle 2, cycle 4, and cycle 6 LCLs.

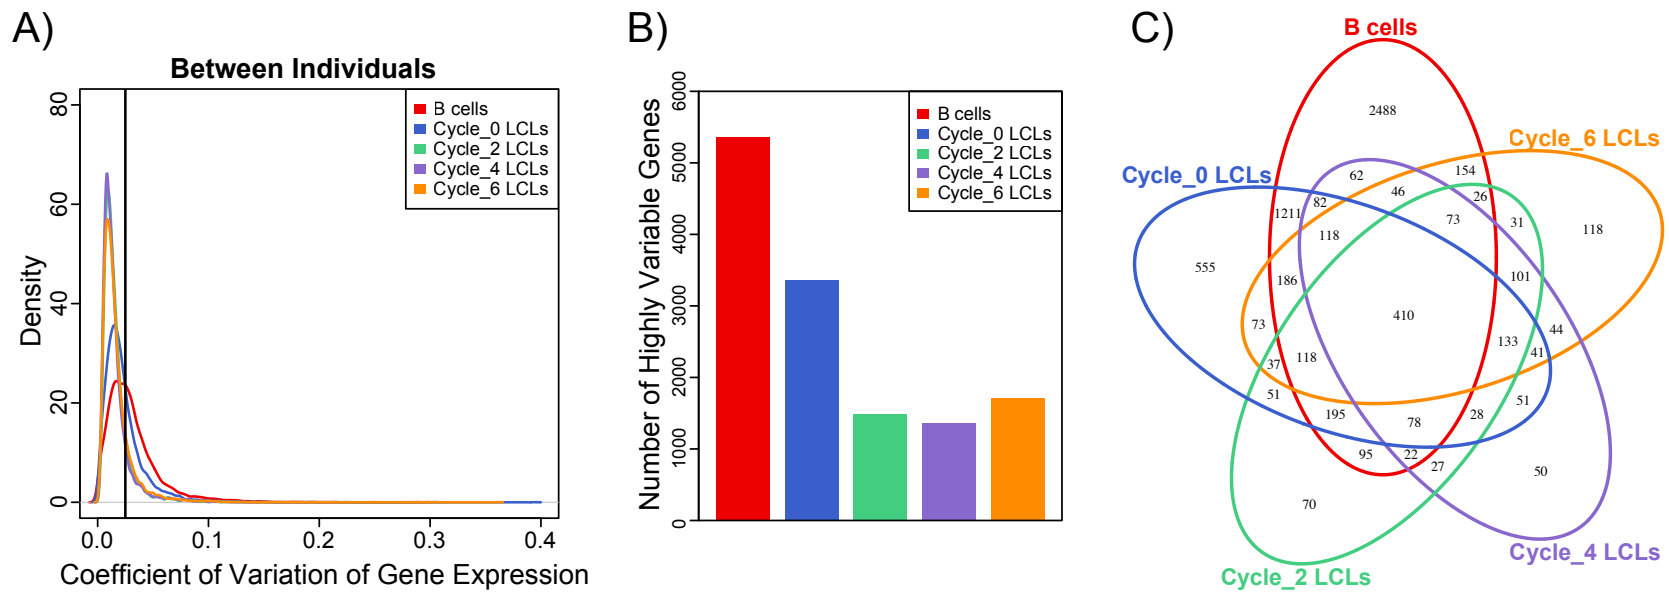

**Table S1.** Properties of the cells used in the study. For CD20+ B cells, time period of cell isolation/culturing corresponds to the dates when the cells were isolated. For Cycle 0 LCLs, time period of cell isolation/culturing corresponds to the dates from LCL establishment to freezing-down. For the rest of the LCLs, time period of cell isolation/culturing corresponds to the dates from thawing the LCLs to freezing-down. Number of freeze-thaw cycles is the number of times cells were frozen-thawed prior to cell culturing. Passage number refers to the number of times that a cell population has been transferred from one cell culture flask to another. RNA/DNA and gene expression data collection were performed at every other freeze-thaw cycle.

| <b>Cell Type</b> | <b>Time period of cell isolation/culturing</b> | <b>Number of freeze-thaw cycles</b> | <b>Passage number</b> | <b>RNA/DNA collection</b> | <b>Gene expression data collection</b> |
|------------------|------------------------------------------------|-------------------------------------|-----------------------|---------------------------|----------------------------------------|
| CD20+ B cells    | Oct 09 - Jan 10                                | 0                                   | 0                     | Yes                       | Yes                                    |
| Cycle_0 LCLs     | Oct 09 - Feb 10                                | 0                                   | 1                     | Yes                       | Yes                                    |
| Cycle_1 LCLs     | Feb 11 - May 11                                | 1                                   | 3                     | No                        | No                                     |
| Cycle_2 LCLs     | June 11 - Aug 11                               | 2                                   | 5                     | Yes                       | Yes                                    |
| Cycle_3 LCLs     | Nov 11 - Dec 11                                | 3                                   | 7                     | No                        | No                                     |
| Cycle_4 LCLs     | Feb 12 - Apr 12                                | 4                                   | 9                     | Yes                       | Yes                                    |
| Cycle_5 LCLs     | June 12 - Aug 12                               | 5                                   | 11                    | No                        | No                                     |
| Cycle_6 LCLs     | Oct 12 - Dec 12                                | 6                                   | 13                    | Yes                       | Yes                                    |

**Table S2.** *P* values derived from testing (T-test; two-sided) the null hypothesis that the means of the EBV copy numbers between each freeze-thaw cycle comparison are the same.

| <b>Comparison</b>   | <b><i>P</i> value</b>  |
|---------------------|------------------------|
| Cycle_0 vs. Cycle_2 | $4.94 \times 10^{-05}$ |
| Cycle_0 vs. Cycle_4 | $2.23 \times 10^{-06}$ |
| Cycle_0 vs. Cycle_6 | $2.65 \times 10^{-05}$ |
| Cycle_2 vs. Cycle_4 | 0.7273                 |
| Cycle_2 vs. Cycle_6 | 0.1355                 |
| Cycle_4 vs. Cycle_6 | 0.04081                |

**Table S3.** Kyoto Encyclopedia of Genes and Genomes (KEGG) pathway enrichment results for the 1,719 genes whose expression was correlated with EBV copy number among cycle 0 LCLs. Enriched KEGG pathways at *P* value cut-off of 0.1 are shown.

| Enriched KEGG pathway                      | Fold enrichment | Enrichment <i>P</i> value | Enrichment <i>P</i> value (FDR-adjusted) |
|--------------------------------------------|-----------------|---------------------------|------------------------------------------|
| DNA replication                            | 3.4             | $1.8 \times 10^{-6}$      | $3.2 \times 10^{-4}$                     |
| Cell cycle                                 | 2.1             | $7.0 \times 10^{-6}$      | $6.3 \times 10^{-4}$                     |
| Parkinson's disease                        | 2.1             | $1.2 \times 10^{-4}$      | $7.2 \times 10^{-3}$                     |
| Base excision repair                       | 2.9             | $5.5 \times 10^{-4}$      | $2.5 \times 10^{-2}$                     |
| Oxidative phosphorylation                  | 1.9             | $2.8 \times 10^{-3}$      | $9.8 \times 10^{-2}$                     |
| Huntington's disease                       | 1.6             | $5.4 \times 10^{-3}$      | $1.5 \times 10^{-1}$                     |
| Homologous recombination                   | 2.6             | $6.7 \times 10^{-3}$      | $1.6 \times 10^{-1}$                     |
| Alzheimer's disease                        | 1.6             | $9.7 \times 10^{-3}$      | $2.0 \times 10^{-1}$                     |
| Pyrimidine metabolism                      | 1.6             | $1.9 \times 10^{-2}$      | $3.2 \times 10^{-1}$                     |
| Oocyte meiosis                             | 1.6             | $3.1 \times 10^{-2}$      | $4.4 \times 10^{-1}$                     |
| Mismatch repair                            | 2.5             | $4.8 \times 10^{-2}$      | $5.5 \times 10^{-1}$                     |
| Valine, leucine and isoleucine degradation | 1.9             | $5.4 \times 10^{-2}$      | $5.6 \times 10^{-1}$                     |
| RIG-I-like receptor signaling pathway      | 1.6             | $5.6 \times 10^{-2}$      | $5.5 \times 10^{-1}$                     |
| Fatty acid elongation in mitochondria      | 3.5             | $8.6 \times 10^{-2}$      | $6.9 \times 10^{-1}$                     |

**Table S4.** *P* values derived from testing (T-test; two-sided) the null hypothesis that the means of the mtDNA copy numbers between each freeze-thaw cycle comparison are the same.

| <b>Comparison</b>   | <b><i>P</i> value</b>  |
|---------------------|------------------------|
| Cycle_0 vs. Cycle_2 | $9.72 \times 10^{-11}$ |
| Cycle_0 vs. Cycle_4 | $7.53 \times 10^{-09}$ |
| Cycle_0 vs. Cycle_6 | $6.02 \times 10^{-10}$ |
| Cycle_2 vs. Cycle_4 | 0.153                  |
| Cycle_2 vs. Cycle_6 | 0.19                   |
| Cycle_4 vs. Cycle_6 | 0.8595                 |

**Table S5.** *P* values derived from testing (T-test; two-sided) the null hypothesis that the means of the inter-individual correlation between each freeze-thaw cycle comparison are the same.

| <b>Comparison</b>   | <b>P value</b>         |
|---------------------|------------------------|
| Cycle_0 vs. Cycle_2 | $2.66 \times 10^{-06}$ |
| Cycle_0 vs. Cycle_4 | $1.98 \times 10^{-06}$ |
| Cycle_0 vs. Cycle_6 | $4.25 \times 10^{-06}$ |
| Cycle_2 vs. Cycle_4 | 0.6308                 |
| Cycle_2 vs. Cycle_6 | 0.5222                 |
| Cycle_4 vs. Cycle_6 | 0.2556                 |



**Table S6.** KEGG pathway enrichment results for the 503 ‘highly variable’ genes across all cell types/freeze-thaw cycles. Enriched KEGG pathways at *P* value cut-off of 0.1 are shown.

| Enriched KEGG pathway                        | Fold enrichment | Enrichment <i>P</i> value | Enrichment <i>P</i> value (FDR-adjusted) |
|----------------------------------------------|-----------------|---------------------------|------------------------------------------|
| Chemokine signaling pathway                  | 2.1             | $6.0 \times 10^{-3}$      | $5.7 \times 10^{-1}$                     |
| Axon guidance                                | 2.6             | $7.2 \times 10^{-3}$      | $4.0 \times 10^{-1}$                     |
| Jak-STAT signaling pathway                   | 2.2             | $1.1 \times 10^{-2}$      | $4.0 \times 10^{-1}$                     |
| Cytokine-cytokine receptor interaction       | 2.0             | $1.5 \times 10^{-2}$      | $4.2 \times 10^{-1}$                     |
| Viral myocarditis                            | 3.0             | $2.4 \times 10^{-2}$      | $5.0 \times 10^{-1}$                     |
| B cell receptor signaling pathway            | 2.4             | $3.2 \times 10^{-2}$      | $5.3 \times 10^{-1}$                     |
| ErbB signaling pathway                       | 2.3             | $3.5 \times 10^{-2}$      | $5.1 \times 10^{-1}$                     |
| Thyroid cancer                               | 3.5             | $4.8 \times 10^{-2}$      | $5.8 \times 10^{-1}$                     |
| Bladder cancer                               | 2.9             | $5.0 \times 10^{-2}$      | $5.5 \times 10^{-1}$                     |
| Hematopoietic cell lineage                   | 2.5             | $5.8 \times 10^{-2}$      | $5.7 \times 10^{-1}$                     |
| Natural killer cell mediated cytotoxicity    | 2.0             | $6.2 \times 10^{-2}$      | $5.6 \times 10^{-1}$                     |
| Leukocyte transendothelial migration         | 2.0             | $7.0 \times 10^{-2}$      | $5.7 \times 10^{-1}$                     |
| Acute myeloid leukemia                       | 2.3             | $7.6 \times 10^{-2}$      | $5.7 \times 10^{-1}$                     |
| MAPK signaling pathway                       | 1.6             | $8.2 \times 10^{-2}$      | $5.8 \times 10^{-1}$                     |
| Phosphatidylinositol signaling system        | 2.2             | $8.9 \times 10^{-2}$      | $5.8 \times 10^{-1}$                     |
| Glycine, serine and threonine metabolism     | 3.7             | $9.0 \times 10^{-2}$      | $5.6 \times 10^{-1}$                     |
| Intestinal immune network for IgA production | 2.8             | $9.9 \times 10^{-2}$      | $5.8 \times 10^{-1}$                     |

**Table S7.** KEGG pathway enrichment results for the ‘highly variable’ genes only within a specific cell type/freeze-thaw cycle. Enriched KEGG pathways at *P* value cut-off of 0.1 are shown. Results shown for **A)** 1,862 ‘highly variable’ genes only in B cells **B)** 891 ‘highly variable’ genes only in cycle 0 LCLs **C)** 101 ‘highly variable’ genes only in cycle 6 LCLs. There were no enriched pathways among 74 ‘highly variable’ genes only in cycle 2 LCLs and 49 ‘highly variable’ genes only in cycle 4 LCLs at *P* value cut-off of 0.1

**A) 1,862 ‘highly variable’ genes only in B cells**

| Enriched KEGG pathway          | Fold enrichment | Enrichment <i>P</i> value | Enrichment <i>P</i> value (FDR-adjusted) |
|--------------------------------|-----------------|---------------------------|------------------------------------------|
| Ubiquitin mediated proteolysis | 1.6             | $6.9 \times 10^{-3}$      | $6.9 \times 10^{-1}$                     |
| Spliceosome                    | 1.6             | $1.9 \times 10^{-2}$      | $8.0 \times 10^{-1}$                     |
| TGF-beta signaling pathway     | 1.8             | $5.4 \times 10^{-2}$      | $9.6 \times 10^{-1}$                     |
| mTOR signaling pathway         | 1.8             | $5.4 \times 10^{-2}$      | $9.6 \times 10^{-1}$                     |
| Apoptosis                      | 1.5             | $7.2 \times 10^{-2}$      | $9.6 \times 10^{-1}$                     |
| Glycerophospholipid metabolism | 1.8             | $9.3 \times 10^{-2}$      | $9.6 \times 10^{-1}$                     |

**B) 891 ‘highly variable’ genes only in cycle 0 LCLs**

| Enriched KEGG pathway           | Fold enrichment | Enrichment <i>P</i> value | Enrichment <i>P</i> value (FDR-adjusted) |
|---------------------------------|-----------------|---------------------------|------------------------------------------|
| Cell cycle                      | 2.2             | $3.1 \times 10^{-3}$      | $3.8 \times 10^{-1}$                     |
| Aminoacyl-tRNA biosynthesis     | 2.9             | $9.3 \times 10^{-3}$      | $5.2 \times 10^{-1}$                     |
| RNA degradation                 | 2.2             | $7.1 \times 10^{-2}$      | $9.8 \times 10^{-1}$                     |
| Terpenoid backbone biosynthesis | 3.8             | $8.2 \times 10^{-2}$      | $9.6 \times 10^{-1}$                     |
| Spliceosome                     | 1.6             | $8.5 \times 10^{-2}$      | $9.4 \times 10^{-1}$                     |

**C) 101 ‘highly variable’ genes only in cycle 6 LCLs**

| Enriched KEGG pathway                | Fold enrichment | Enrichment <i>P</i> value | Enrichment <i>P</i> value (FDR-adjusted) |
|--------------------------------------|-----------------|---------------------------|------------------------------------------|
| Maturity onset diabetes of the young | 34.8            | $2.8 \times 10^{-3}$      | $1.8 \times 10^{-1}$                     |
| Long-term potentiation               | 7.1             | $6.1 \times 10^{-2}$      | $8.9 \times 10^{-1}$                     |
| Gap junction                         | 5.9             | $8.5 \times 10^{-2}$      | $8.8 \times 10^{-1}$                     |
| Melanogenesis                        | 5.5             | $9.7 \times 10^{-2}$      | $8.4 \times 10^{-1}$                     |

**Table S8.** *P* values derived from testing (Fisher’s exact test; two-sided) the null hypothesis that the proportion of genes with eQTLs among ‘highly variable’ genes (HVG) is equal to that among all the genes in our data.

| Comparison                        | LCL Study 1 | LCL Study 2 | LCL Study 3 | LCL Study 4 | LCL Study 5 | LCL Study 6 | LCL Study 7 | Cortex Study | Liver Study | Fibroblast Study | T cell Study | Monocyte Study |
|-----------------------------------|-------------|-------------|-------------|-------------|-------------|-------------|-------------|--------------|-------------|------------------|--------------|----------------|
| HVG in B cells vs. All genes      | 0.5352      | 0.2415      | 0.2712      | 0.2343      | 0.2226      | 8.96E-03    | 2.20E-02    | 1            | 0.6703      | 0.2904           | 0.1828       | 6.96E-07       |
| HVG in Cycle_0 LCLs vs. All genes | 0.09222     | 4.98E-03    | 1.74E-02    | 0.3376      | 0.1009      | 6.16E-04    | 6.39E-05    | 0.4799       | 0.2095      | 0.04134          | 0.2779       | 1.97E-08       |
| HVG in Cycle_2 LCLs vs. All genes | 3.18E-04    | 5.11E-06    | 1.05E-08    | 0.2849      | 1.95E-04    | 0.001245    | 5.89E-11    | 0.2124       | 0.4561      | 5.89E-08         | 2.38E-06     | 3.75E-11       |
| HVG in Cycle_4 LCLs vs. All genes | 4.43E-04    | 1.06E-04    | 1.07E-08    | 0.1453      | 2.56E-05    | 0.0862      | 2.22E-07    | 0.649        | 0.7322      | 3.58E-07         | 2.22E-06     | 1.51E-09       |
| HVG in Cycle_6 LCLs vs. All genes | 4.96E-05    | 2.40E-09    | 1.31E-04    | 0.1301      | 1.15E-04    | 0.003269    | 4.74E-07    | 0.1587       | 0.7479      | 2.64E-04         | 4.52E-04     | 7.13E-11       |

**Table S9.** *P* values derived from testing (T-test; two-sided) the null hypothesis that the mean of the coefficient of variation of gene expression between genes with eQTLs is equal to that of all the genes detected as expressed.

| <b>Comparison</b>                             | <b>B cell</b>          | <b>Cycle_0<br/>LCLs</b> | <b>Cycle_2<br/>LCLs</b> | <b>Cycle_4<br/>LCLs</b> | <b>Cycle_6<br/>LCLs</b> |
|-----------------------------------------------|------------------------|-------------------------|-------------------------|-------------------------|-------------------------|
| Genes with eQTLs in LCL-Study 1 vs. All genes | 0.3912                 | 0.05667                 | 0.003533                | 0.001108                | 0.0002601               |
| Genes with eQTLs in LCL-Study 2 vs. All genes | 0.1232                 | 0.001252                | 1.45x10 <sup>-05</sup>  | 1.90x10 <sup>-05</sup>  | 3.09x10 <sup>-07</sup>  |
| Genes with eQTLs in LCL-Study 3 vs. All genes | 0.112                  | 0.001431                | 6.95x10 <sup>-07</sup>  | 8.04x10 <sup>-06</sup>  | 9.57x10 <sup>-06</sup>  |
| Genes with eQTLs in LCL-Study 4 vs. All genes | 0.9207                 | 0.09385                 | 0.1555                  | 0.02411                 | 0.05787                 |
| Genes with eQTLs in LCL-Study 5 vs. All genes | 0.3                    | 0.123                   | 0.0001259               | 6.62x10 <sup>-05</sup>  | 8.25x10 <sup>-05</sup>  |
| Genes with eQTLs in LCL-Study 6 vs. All genes | 0.2948                 | 0.003052                | 0.0002894               | 0.03685                 | 0.003905                |
| Genes with eQTLs in LCL-Study 7 vs. All genes | 0.0555                 | 5.13x10 <sup>-06</sup>  | 9.43x10 <sup>-12</sup>  | 1.97x10 <sup>-09</sup>  | 2.68x10 <sup>-09</sup>  |
| Genes with eQTLs in Cortex vs. All genes      | 0.8558                 | 0.9705                  | 0.3255                  | 0.7476                  | 0.1098                  |
| Genes with eQTLs in Liver vs. All genes       | 0.9708                 | 0.1654                  | 0.8063                  | 0.3142                  | 0.4065                  |
| Genes with eQTLs in Fibroblast vs. All genes  | 0.06161                | 0.05469                 | 1.90x10 <sup>-06</sup>  | 3.05x10 <sup>-06</sup>  | 3.97x10 <sup>-05</sup>  |
| Genes with eQTLs in T cell vs. All genes      | 0.08497                | 0.0501                  | 0.0002006               | 0.0001995               | 0.0001379               |
| Genes with eQTLs in Monocyte vs. All genes    | 7.32x10 <sup>-14</sup> | 1.12x10 <sup>-12</sup>  | 1.02x10 <sup>-09</sup>  | 1.96x10 <sup>-09</sup>  | 2.84x10 <sup>-12</sup>  |

**Table S10.** Number of overlap between 503 genes that were ‘highly variable’ across each cell type/freeze-thaw cycle and genes with eQTLs (as identified in each of the eQTL study). Hypergeometric test is used to calculate the significance of overlap between 503 ‘highly variable’ genes across each cell type/freeze-thaw cycle and genes with cis eQTLs that were detected as expressed in our study.

| eQTL study name  | Number of Ensembl genes with cis eQTLs | Number of Ensembl genes with cis eQTLs that were detected as expressed in our study | Number of overlap between 503 genes that were ‘highly variable’ across each cell type/freeze-thaw cycle and genes with cis eQTLs | <i>P</i> value (Significance of overlap) |
|------------------|----------------------------------------|-------------------------------------------------------------------------------------|----------------------------------------------------------------------------------------------------------------------------------|------------------------------------------|
| LCL-Study 1      | 438                                    | 325                                                                                 | 26                                                                                                                               | 0.0090                                   |
| LCL-Study 2      | 794                                    | 561                                                                                 | 49                                                                                                                               | 4.63x10 <sup>-05</sup>                   |
| LCL-Study 3      | 442                                    | 318                                                                                 | 42                                                                                                                               | 3.00x10 <sup>-09</sup>                   |
| LCL-Study 4      | 1084                                   | 790                                                                                 | 47                                                                                                                               | 0.088                                    |
| LCL-Study 5      | 830                                    | 514                                                                                 | 53                                                                                                                               | 1.50x10 <sup>-07</sup>                   |
| LCL-Study 6      | 1894                                   | 1564                                                                                | 93                                                                                                                               | 0.021                                    |
| LCL-Study 7      | 778                                    | 614                                                                                 | 57                                                                                                                               | 1.63x10 <sup>-06</sup>                   |
| Cortex-Study     | 68                                     | 38                                                                                  | 2                                                                                                                                | 0.56                                     |
| Liver-Study      | 2057                                   | 1155                                                                                | 56                                                                                                                               | 0.54                                     |
| Fibroblast-Study | 427                                    | 286                                                                                 | 32                                                                                                                               | 9.31x10 <sup>-06</sup>                   |
| T cell-Study     | 430                                    | 273                                                                                 | 30                                                                                                                               | 2.51x10 <sup>-05</sup>                   |
| Monocyte-Study   | 2510                                   | 1714                                                                                | 138                                                                                                                              | 2.64x10 <sup>-10</sup>                   |

**Table S11.** *P* values from the linear regressions testing the association between three variables (cell type, freeze-thaw cycle, individual) and the axis-scores of the first five principal components **A)** PCA was applied to 10,313 genes that were detected as expressed. **B)** PCA was applied to 26, 49, 42, 47, 53, 93, and 57 genes that were both among the ‘highly variable’ genes across all cell types/freeze-thaw cycles in our study and that had eQTLs in the corresponding eQTL studies (in LCLs). **C)** PCA was applied to 2, 56, 32, 30, and 138 genes that were both among the ‘highly variable’ genes across all cell types/freeze-thaw cycles in our study and that had eQTLs in the corresponding eQTL studies (in cortex, liver, fibroblast, T cell, and monocyte).

**A)**

| Principal Components | 10,313 Genes |                   |            |
|----------------------|--------------|-------------------|------------|
|                      | Cell type    | Freeze-thaw cycle | Individual |
| PC1                  | 9.192E-14    | 0.000000719       | 0.9999     |
| PC2                  | 0.05953      | 0.03997           | 0.9986     |
| PC3                  | 0.7296       | 0.6477            | 0.4433     |
| PC4                  | 0.8516       | 0.002356          | 0.4261     |
| PC5                  | 0.8134       | 0.03624           | 0.03388    |

**B)**

| Principal Components | 26 Genes - LCL-Study 1 |                   |             |
|----------------------|------------------------|-------------------|-------------|
|                      | Cell type              | Freeze-thaw cycle | Individual  |
| PC1                  | 0.01926                | 0.6678            | 0.000001762 |
| PC2                  | 1.279E-09              | 0.003237          | 0.5663      |
| PC3                  | 0.8518                 | 0.7195            | 0.000001175 |
| PC4                  | 0.9605                 | 0.04381           | 0.3094      |
| PC5                  | 0.6298                 | 0.09555           | 0.4442      |
| Principal Components | 49 Genes - LCL-Study 2 |                   |             |
|                      | Cell type              | Freeze-thaw cycle | Individual  |
| PC1                  | 0.0005666              | 0.2653            | 0.0005349   |
| PC2                  | 0.000001117            | 0.001056          | 0.1112      |
| PC3                  | 0.3536                 | 0.004043          | 0.9575      |
| PC4                  | 0.7508                 | 0.655             | 0.01657     |
| PC5                  | 0.7039                 | 0.5626            | 0.0003505   |
| Principal Components | 42 Genes - LCL-Study 3 |                   |             |
|                      | Cell type              | Freeze-thaw cycle | Individual  |
| PC1                  | 0.006844               | 0.4172            | 0.00002487  |
| PC2                  | 0.000002158            | 0.001768          | 0.1231      |
| PC3                  | 0.2309                 | 0.0445            | 0.5274      |
| PC4                  | 0.1325                 | 0.6045            | 0.00000527  |
| PC5                  | 0.6214                 | 0.4274            | 0.000001291 |
| Principal Components | 47 Genes - LCL-Study 4 |                   |             |
|                      | Cell type              | Freeze-thaw cycle | Individual  |
| PC1                  | 0.001035               | 0.2641            | 0.0002442   |
| PC2                  | 0.000003325            | 0.001011          | 0.1346      |
| PC3                  | 0.1547                 | 0.03196           | 0.6482      |
| PC4                  | 0.7822                 | 0.03547           | 0.02793     |
| PC5                  | 0.9387                 | 0.8243            | 0.03638     |
| Principal Components | 53 Genes - LCL-Study 5 |                   |             |
|                      | Cell type              | Freeze-thaw cycle | Individual  |
| PC1                  | 3.122E-08              | 0.0001649         | 0.2953      |
| PC2                  | 0.08875                | 0.1081            | 0.00007801  |

|                               |                  |                          |                   |
|-------------------------------|------------------|--------------------------|-------------------|
| PC3                           | 0.02251          | 0.2141                   | 0.7265            |
| PC4                           | 0.8947           | 0.5244                   | 0.001113          |
| PC5                           | 0.6212           | 0.5445                   | 0.02624           |
| <b>93 Genes - LCL-Study 6</b> |                  |                          |                   |
| <b>Principal Components</b>   | <b>Cell type</b> | <b>Freeze-thaw cycle</b> | <b>Individual</b> |
| PC1                           | 6.313E-14        | 0.000001159              | 0.9965            |
| PC2                           | 0.09683          | 0.03447                  | 0.9871            |
| PC3                           | 0.9226           | 0.02706                  | 0.05109           |
| PC4                           | 0.6905           | 0.9664                   | 0.3217            |
| PC5                           | 0.8692           | 0.7758                   | 0.000003368       |
| <b>57 Genes - LCL-Study 7</b> |                  |                          |                   |
| <b>Principal Components</b>   | <b>Cell type</b> | <b>Freeze-thaw cycle</b> | <b>Individual</b> |
| PC1                           | 5.327E-14        | 0.0000326                | 0.9569            |
| PC2                           | 0.4234           | 0.5526                   | 1.715E-07         |
| PC3                           | 0.3991           | 0.02191                  | 0.4518            |
| PC4                           | 0.5794           | 0.7388                   | 0.005308          |
| PC5                           | 0.3361           | 0.7571                   | 0.002215          |

C)

|                                    |                  |                          |                   |
|------------------------------------|------------------|--------------------------|-------------------|
| <b>2 Genes - Cortex Study</b>      |                  |                          |                   |
| <b>Principal Components</b>        | <b>Cell type</b> | <b>Freeze-thaw cycle</b> | <b>Individual</b> |
| PC1                                | 0.08494          | 0.3628                   | 3.539E-07         |
| PC2                                | 0.9996           | 0.2712                   | 0.01317           |
| PC3                                | NA               | NA                       | NA                |
| PC4                                | NA               | NA                       | NA                |
| PC5                                | NA               | NA                       | NA                |
| <b>56 Genes - Liver Study</b>      |                  |                          |                   |
| <b>Principal Components</b>        | <b>Cell type</b> | <b>Freeze-thaw cycle</b> | <b>Individual</b> |
| PC1                                | 2.901E-16        | 0.00003945               | 0.9985            |
| PC2                                | 0.1722           | 0.05871                  | 0.8866            |
| PC3                                | 0.7448           | 0.02392                  | 0.06088           |
| PC4                                | 0.8004           | 0.611                    | 0.000009785       |
| PC5                                | 0.9919           | 0.6978                   | 0.04852           |
| <b>32 Genes - Fibroblast Study</b> |                  |                          |                   |
| <b>Principal Components</b>        | <b>Cell type</b> | <b>Freeze-thaw cycle</b> | <b>Individual</b> |
| PC1                                | < 2.2e-16        | 0.000167                 | 0.9959            |
| PC2                                | 0.9893           | 0.2143                   | 0.00009866        |
| PC3                                | 0.51             | 0.05103                  | 0.06856           |
| PC4                                | 0.8559           | 0.7027                   | 0.001544          |
| PC5                                | 0.7647           | 0.2029                   | 0.01543           |
| <b>30 Genes - T cell Study</b>     |                  |                          |                   |
| <b>Principal Components</b>        | <b>Cell type</b> | <b>Freeze-thaw cycle</b> | <b>Individual</b> |
| PC1                                | 0.07886          | 0.9375                   | 0.000000496       |
| PC2                                | 1.043E-11        | 0.00421                  | 0.5823            |
| PC3                                | 0.4782           | 0.7275                   | 0.000002201       |
| PC4                                | 0.9457           | 0.01068                  | 0.1195            |
| PC5                                | 0.7094           | 0.6706                   | 4.185E-09         |
| <b>138 Genes - Monocyte Study</b>  |                  |                          |                   |
| <b>Principal Components</b>        | <b>Cell type</b> | <b>Freeze-thaw cycle</b> | <b>Individual</b> |
| PC1                                | 1.88E-13         | 9.906E-07                | 0.9969            |
| PC2                                | 0.7359           | 0.9613                   | 1.855E-08         |
| PC3                                | 0.08609          | 0.02456                  | 0.9387            |
| PC4                                | 0.4502           | 0.05058                  | 0.2185            |
| PC5                                | 0.7987           | 0.5179                   | 0.04216           |
